# Supplementary material for: Environmental heterogeneity and its influence on fern diversity: A case study in the low-altitude mountain forest in central Taiwan
Source: Research Square preprint supplement (doi:10.21203/rs.3.rs-6772342/v1), 2025-06-11
Supplement: Supplementary file 1 [file b064614e77dbbd98e85287d7.docx]

**Supplementary Information**

**Environmental heterogeneity and its influence on fern diversity: A case study in the low-altitude mountain forest in central Taiwan**

Pei-Hsuan Lee1,2, Yao-Moan Huang2, Li-Wan Chang2, Jian-Hong Yang2, Wen-Liang Chiou2, Yen-Hsueh Tseng1,2, Hsy-Yu Tzeng1,*

1 Department of Forestry, National Chung Hsing University. No. 145, Xingda Rd., South Dist., Taichung 402202, Taiwan.

2 Taiwan Forestry Research Institute, No. 53, Nanhai Rd., Taipei 100051, Taiwan.

* Corresponding author. E-mail: [erecta@nchu.edu.tw](mailto:erecta@nchu.edu.tw).

Number of pages: 10

Number of tables: 3

Number of notes: 1

Table S1. The mean, standard deviation (SD), minimum, and maximum values of various environmental factors at a one-hectare natural forest plot located in Lienhuachih area of the low-altitude mountains in central Taiwan. *: Circular statistics were used for calculations.

| Environments | Mean | SD | Min | Max |
| --- | --- | --- | --- | --- |
| Topography |  |  |  |  |
| Elevation (m) | 779.6 | 14.8 | 755.2 | 814.0 |
| Stream distance (m) | 17.5 | 11.9 | 0.0 | 50.0 |
| Aspect (º)* | 77.9 | 66.3 | 19.0 | 328.0 |
| Curvature | 0.0 | 4.5 | -13.3 | 11.3 |
| Slope (º) | 33.8 | 7.0 | 17.3 | 51.2 |
| TWI | 3.3 | 0.7 | 1.9 | 5.0 |
|  |  |  |  |  |
| Soil property |  |  |  |  |
| Soil water (%) | 38.5 | 2.3 | 30.2 | 46.7 |
| pH | 3.5 | 0.2 | 3.2 | 3.8 |
| K (cmole/kg) | 89.8 | 13.7 | 70.3 | 110.8 |
| Mg (cmole/kg) | 22.9 | 5.1 | 14.8 | 30.8 |
| Mn (cmole/kg) | 15.3 | 15.4 | 0.8 | 54.5 |
| Zn (cmole/kg) | 2.2 | 0.3 | 1.9 | 2.8 |
| Fe (cmole/kg) | 345.6 | 27.5 | 297.6 | 385.1 |
| Cu (cmole/kg) | 0.6 | 0.2 | 0.3 | 0.9 |
| Ca (cmole /kg) | 43.3 | 13.6 | 21.9 | 69.4 |
| P (mg/kg) | 12.9 | 2.5 | 10.1 | 18.5 |
| N (%) | 0.30 | 0.05 | 0.24 | 0.41 |
| C/N ratio | 14.3 | 0.8 | 13.2 | 15.9 |
|  |  |  |  |  |
| Biological factors |  |  |  |  |
| Canopy openness (%) | 9.1 | 6.4 | 1.0 | 34.4 |
| Tree’s density (n/100m2) | 24.1 | 11.6 | 0.0 | 58.0 |
| Herb and vine (%) | 1.0 | 0.5 | 0.0 | 7.5 |
| Saplings (%) | 1.0 | 0.6 | 0.0 | 4.4 |

Table S2. The checklist of understory vascular plant species identified within one-hectare plot of natural forest in Lienhuachih area, central Taiwan. The lifeforms represented include fern, herb, vine, and sapling. The “fernE” is epiphytic ferns, while the “fern” is terrestrial ferns.

| Family | Scientific Name | Lifeform | Subplots |
| --- | --- | --- | --- |
| Selaginellaceae | *Selaginella doederleinii* Hieron. | fern | 5 |
| Aspleniaceae | *Asplenium antiquum* Makino | fernE | 1 |
| Aspleniaceae | *Asplenium nidus* L. | fernE | 5 |
| Aspleniaceae | *Asplenium pseudolaserpitiifolium* Ching | fernE | 2 |
| Aspleniaceae | *Hymenasplenium apogamum* (N. Murak. & Hatan.) Nakaike | fern | 9 |
| Aspleniaceae | *Hymenasplenium cheilosorum* (Kunze *ex* Mett.) Tagawa | fern | 7 |
| Aspleniaceae | *Hymenasplenium excisum* (C.Presl) S.Linds. | fern | 12 |
| Athyriaceae | *Deparia petersenii* (Kunze) M.Kato | fern | 1 |
| Athyriaceae | *Diplazium dilatatum* Blume | fern | 98 |
| Athyriaceae | *Diplazium donianum* (Mett.) Tardieuvar. *aphanoneuron* (Ohwi) Tagawa | fern | 21 |
| Athyriaceae | *Diplazium donianum* (Mett.) Tardieu var*. donianum* (Mett.) Tardieu | fern | 33 |
| Blechnaceae | *Blechnopsis orientalis* (L.) C.Presl | fern | 9 |
| Cibotiaceae | *Cibotium barometz* (L.) J.Sm*.* | fern | 34 |
| Cyatheaceae | *Alsophila podophylla* Hook*.* | fern | 3 |
| Davalliaceae | *Davallia divaricata* Blume | fernE | 1 |
| Dennstaedtiaceae | *Microlepia calvescens* (Wall. *ex* Hook.) C.Presl | fern | 1 |
| Dennstaedtiaceae | *Microlepia hookeriana* (Wall. *ex* Hook.) C.Presl | fern | 4 |
| Dennstaedtiaceae | *Microlepia marginata* (Panzer) C.Chr. | fern | 8 |
| Dennstaedtiaceae | *Microlepia obtusiloba* Hayata | fern | 13 |
| Dennstaedtiaceae | *Microlepia speluncae* (L.) T.Moore | fern | 3 |
| Dennstaedtiaceae | *Microlepia × bipinnata* (Makino) Shimura | fern | 2 |
| Dryopteridaceae | *Arachniodes amabilis* (Blume) Tindale var. *fimbriata* K.Iwats | fern | 3 |
| Dryopteridaceae | *Arachniodes pseudoaristata* (Tagawa) Ohwi | fern | 18 |
| Dryopteridaceae | *Bolbitis appendiculata* (Willd.) K.Iwats. | fern | 1 |
| Dryopteridaceae | *Bolbitis subcordata* (Copel.) Ching | fern | 2 |
| Dryopteridaceae | *Dryopteris polita* Rosenst*.* | fern | 3 |
| Dryopteridaceae | *Dryopteris sparsa* (D. Don) Kuntze | fern | 1 |
| Dryopteridaceae | *Pleocnemia winitii* Holttum | fern | 90 |
| Gleicheniaceae | *Dicranopteris linearis* (Burm. f.) Underw. | fern | 4 |
| Gleicheniaceae | *Dicranopteris tetraphylla* (Rosenst.) C.M. Kuo | fern | 1 |
| Gleicheniaceae | *Diplopterygium blotianum* (C.Chr.) Nakai | fern | 1 |
| Gleicheniaceae | *Diplopterygium chinensis* (Rosenst.) DeVol | fern | 1 |
| Hymenophyllaceae | *Vandenboschia auriculata* (Blume) Copel. | fernE | 2 |
| Lomariopsidaceae | *Lomariopsis spectabilis* (Kunze) Mett. | fernE | 1 |
| Lygodiaceae | *Lygodium japonicum* (Thunb.) Sw. | fern | 4 |
| Marattiaceae | *Angiopteris lygodiifolia* Rosenst*.* | fern | 21 |
| Polypodiaceae | *Drynaria coronans* (Wall. *ex* Mett.) J.Sm. *ex* T.Moore | fernE | 1 |
| Polypodiaceae | *Leptochilus hemionitideus* (C.Presl) Noot. | fern | 5 |
| Polypodiaceae | *Leptochilus wrightii* (Hook. & Baker) X.C.Zhang | fern | 1 |
| Pteridaceae | *Pteris arisanensis* Tagawa | fern | 10 |
| Pteridaceae | *Pteris dimorpha* Copel. | fern | 18 |
| Pteridaceae | *Pteris fauriei* Hieron*.* | fern | 2 |
| Pteridaceae | *Pteris grevilleana* Wall. *ex* J. Agardh | fern | 4 |
| Tectariaceae | *Arthropteris palisotii* (Desv.) Alston | fernE | 9 |
| Tectariaceae | *Tectaria harlandii* (Hook.) C.M.Kuo | fern | 2 |
| Tectariaceae | *Tectaria simonsii* (Baker) Ching | fern | 26 |
| Tectariaceae | *Tectaria subtriphylla* (Hook. & Arn.) Copel. | fern | 2 |
| Thelypteridaceae | *Christella parasitica* (L.) H.Lév. *ex* Y.H.Chang | fern | 7 |
| Thelypteridaceae | *Pronephrium simplex* (Hook.) Holttum | fern | 1 |
| Thelypteridaceae | *Sphaerostephanos taiwanensis* (C.Chr.) Holttum *ex* C.M.Kuo | fern | 6 |
| Thelypteridaceae | *Stegnogramma griffithii* (T.Moore) K. Iwats. | fern | 1 |
| Podocarpaceae | *Podocarpus nakaii* Hayata | sapling | 18 |
| Araceae | *Alocasia odora* (Roxb.) K. Koch | herb | 3 |
| Araceae | *Pothos chinensis* (Raf.) Merr. | herb | 71 |
| Araceae | *Rhaphidophora hongkongensis* Schott | vine | 1 |
| Arecaceae | *Arenga tremula* (Blanco) Becc. | herb | 1 |
| Arecaceae | *Calamus formosanus* Becc*.* | vine | 98 |
| Asparagaceae | *Ophiopogon intermedius* D.Don | herb | 5 |
| Commelinaceae | *Amischotolype hispida* (Less. & A. Rich.) D.Y.Hong | herb | 5 |
| Commelinaceae | *Pollia japonica* Thunb*.* | herb | 2 |
| Cyperaceae | *Carex baccans* Nees | herb | 8 |
| Cyperaceae | *Carex filicina* Nees | herb | 1 |
| Dioscoreaceae | *Dioscorea japonica* Thunb. | vine | 4 |
| Orchidaceae | *Cephalantheropsis gracilis* (Lindl.) S.Y.Hu | herb | 2 |
| Orchidaceae | *Cymbidium dayanum* Rchb.f. | herb | 1 |
| Orchidaceae | *Liparis nigra* Seidenf*.* | herb | 8 |
| Poaceae | *Miscanthus floridulus* (Labill.) Warb. *ex* K.Schum. & Lauterb. | herb | 3 |
| Poaceae | *Oplismenus aemulus* (R. Br.) Roem. & Schult. | herb | 2 |
| Poaceae | *Oplismenus compositus* (L.) P. Beauv. | herb | 21 |
| Poaceae | *Panicum sarmentosum* Roxb*.* | herb | 2 |
| Poaceae | *Setaria palmifolia* (J. Koenig) Stapf | herb | 2 |
| Smilacaceae | *Smilax bracteata* C.Presl var. *bracteate* | vine | 1 |
| Smilacaceae | *Smilax bracteata* C.Presl var. *verruculosa* (Merr.) T. Koyama | vine | 24 |
| Smilacaceae | *Smilax lanceifolia* Roxb*.* | vine | 10 |
| Zingiberaceae | *Alpinia intermedia* Gagnep*.* | herb | 45 |
| Zingiberaceae | *Alpinia nantoensis* F.Y.Lu & Y.W.Kuo | herb | 16 |
| Zingiberaceae | *Zingiber kawagoi* Hayata | herb | 3 |
| Actinidiaceae | *Actinidia latifolia* (Gardner & Champ.) Merr. | vine | 1 |
| Actinidiaceae | *Saurauia tristyla* DC. var*. oldhamii* (Hemsl.) Finet & Gagnep. | sapling | 9 |
| Amaranthaceae | *Achyranthes bidentata* Blume | herb | 2 |
| Annonaceae | *Fissistigma glaucescens* (Hance) Merr. | vine | 2 |
| Annonaceae | *Fissistigma oldhamii* (Hemsl.) Merr. | vine | 44 |
| Apocynaceae | *Anodendron affine* (Hook. & Arn.) Druce | vine | 1 |
| Apocynaceae | *Urceola rosea* (Hook. & Arn.) D.J.Middleton | vine | 2 |
| Aquifoliaceae | *Ilex ficoidea* Hemsl*.* | sapling | 1 |
| Araliaceae | *Eleutherococcus trifoliatus* (L.) S.Y.Hu | sapling | 2 |
| Araliaceae | *Schefflera octophylla* (Lour.) Harms | sapling | 12 |
| Asteraceae | *Chromolaena odorata* (L.) R.M.King & H.Rob*.* | herb | 5 |
| Asteraceae | *Mikania micrantha* Kunth | vine | 5 |
| Asteraceae | *Vernonia gratiosa* Hance | herb | 3 |
| Begoniaceae | *Begonia aptera* Hayata | herb | 1 |
| Begoniaceae | *Begonia laciniata* Roxb*.* | herb | 7 |
| Cannabaceae | *Trema tomentosa* (Roxb.) H.Hara | sapling | 1 |
| Chloranthaceae | *Sarcandra glabra* (Thunb.) Nakai | herb | 12 |
| Convolvulaceae | *Erycibe henryi* Prain | vine | 13 |
| Cucurbitaceae | *Gynostemma pentaphyllum* (Thunb.) Makino | vine | 1 |
| Cucurbitaceae | *Trichosanthes homophylla* Hayata | vine | 2 |
| Ebenaceae | *Diospyros eriantha* Champ. *ex* Benth. | sapling | 4 |
| Ebenaceae | *Diospyros morrisiana* Hance | sapling | 2 |
| Euphorbiaceae | *Mallotus paniculatus* (Lam.) Müll.-Arg. | sapling | 12 |
| Euphorbiaceae | *Mallotus philippensis* (Lam.) Müll. Arg. | sapling | 1 |
| Euphorbiaceae | *Triadica cochinchinensis* Lour*.* | sapling | 5 |
| Fabaceae | *Acacia caesia* (L.) Willd. | vine | 14 |
| Fabaceae | *Archidendron lucidum* (Benth.) I.C.Nielsen | sapling | 4 |
| Fabaceae | *Bauhinia championii* (Benth.) Benth. | vine | 32 |
| Fabaceae | *Callerya nitida* (Benth.) R.Geesink | vine | 7 |
| Fabaceae | *Derris laxiflora* Benth*.* | vine | 2 |
| Fabaceae | *Hylodesmum laterale* (Schindl.) H. Ohashi & R.R. Mill | herb | 4 |
| Fabaceae | *Mucuna macrocarpa* Wall*.* | vine | 15 |
| Fabaceae | *Ormosia formosana* Kaneh*.* | sapling | 10 |
| Fagaceae | *Castanopsis cuspidata* (Thunb. *ex* Murray) Schottky var. *carlesii* (Hemsl.) T.Yamaz. | sapling | 1 |
| Fagaceae | *Castanopsis fargesii* Franch*.* | sapling | 2 |
| Fagaceae | *Lithocarpus hancei* (Benth.) Rehder | sapling | 2 |
| Fagaceae | *Lithocarpus harlandii* (Hance *ex* Walp.) Rehder | sapling | 2 |
| Fagaceae | *Lithocarpus konishii* (Hayata) Hayata | sapling | 5 |
| Fagaceae | *Quercus pachyloma* Seemen | sapling | 2 |
| Gesneriaceae | *Aeschynanthus acuminatus* Wall. *ex* A. DC. | vine | 9 |
| Gesneriaceae | *Rhynchotechum brevipedunculatum* J.C.Wang | herb | 1 |
| Juglandaceae | *Engelhardia roxburghiana* Wall*.* | sapling | 4 |
| Lamiaceae | *Callicarpa formosana* Rolfe | sapling | 4 |
| Lamiaceae | *Callicarpa kochiana* Makino | sapling | 6 |
| Lamiaceae | *Clerodendrum cyrtophyllum* Turcz*.* | sapling | 7 |
| Lamiaceae | *Clerodendrum trichotomum* Thunb*.* | sapling | 2 |
| Lamiaceae | *Paraphlomis formosana* T.H.Hsieh & T.C.Huang | herb | 5 |
| Lardizabalaceae | *Stauntonia obovata* Hemsl*.* | vine | 18 |
| Lardizabalaceae | *Stauntonia obovatifoliola* Hayata | vine | 4 |
| Lauraceae | *Beilschmiedia erythrophloia* Hayata | sapling | 4 |
| Lauraceae | *Cinnamomum micranthum* (Hayata) Hayata | sapling | 1 |
| Lauraceae | *Cryptocarya chinensis* (Hance) Hemsl. | sapling | 27 |
| Lauraceae | *Lindera communis* Hemsl*.* | sapling | 1 |
| Lauraceae | *Litsea acuminata* (Blume) Kurata | sapling | 24 |
| Lauraceae | *Machilus japonica* Sieb. & Zucc. var*. kusanoi* (Hayata) J.C.Liao | sapling | 1 |
| Lauraceae | *Machilus zuihoensis* Hayata | sapling | 6 |
| Lauraceae | *Neolitsea aciculata* (Bl.) Koidz. var*. variabillima* J.C.Liao | sapling | 17 |
| Lauraceae | *Neolitsea konishii* (Hayata) Kaneh. & Sasaki | sapling | 16 |
| Lythraceae | *Lagerstroemia subcostata* Koehne | sapling | 1 |
| Malpighiaceae | *Hiptage benghalensis* (L.) Kurz | vine | 12 |
| Melastomataceae | *Blastus cochinchinensis* Lour. | sapling | 95 |
| Melastomataceae | *Melastoma candidum* D.Don | sapling | 3 |
| Menispermaceae | *Pericampylus formosanus* Diels | vine | 17 |
| Menispermaceae | *Stephania japonica* (Thunb.) Miers | vine | 3 |
| Moraceae | *Ficus benguetensis* Merr. | sapling | 7 |
| Moraceae | *Ficus formosana* Maxim*.* | sapling | 21 |
| Moraceae | *Ficus nervosa* B. Heyne *ex* Roth | sapling | 7 |
| Moraceae | *Ficus sarmentosa* B. Ham. *ex* J. E. Sm.var*. nipponica* (Franch. & Sav.) Corner | vine | 11 |
| Moraceae | *Malaisia scandens* (Lour.) Planch. | vine | 3 |
| Myrtaceae | *Syzygium buxifolium* Hook. & Arn. | sapling | 1 |
| Myrtaceae | *Syzygium formosanum* (Hayata) Mori | sapling | 1 |
| Passifloraceae | *Passiflora suberosa* L*.* | vine | 2 |
| Pentaphylacaceae | *Eurya gnaphalocarpa* Hayata | sapling | 3 |
| Pentaphylacaceae | *Eurya loquaiana* Dunn | sapling | 14 |
| Phyllanthaceae | *Antidesma japonicum* Sieb. & Zucc. var*. acutisepalum* (Hayata) Hurus. | sapling | 1 |
| Phyllanthaceae | *Glochidion acuminatum* Müll. Arg. | sapling | 29 |
| Piperaceae | *Piper kadsura* (Choisy) Ohwi | vine | 32 |
| Piperaceae | *Piper sintenense* Hatus*.* | vine | 12 |
| Primulaceae | *Ardisia chinensis* Benth*.* | herb | 3 |
| Primulaceae | *Ardisia cornudentata* Mez subsp*. morrisonensis* (Hayata) Y.P.Yang | sapling | 2 |
| Primulaceae | *Ardisia quinquegona* Blume | sapling | 57 |
| Primulaceae | *Ardisia sieboldii* Miq*.* | sapling | 23 |
| Primulaceae | *Maesa japonica* (Thunb.) Moritzi & Zoll. | sapling | 14 |
| Primulaceae | *Maesa perlaria* (Lour.) Merr. var*. formosana* (Mez) Y.P.Yang | sapling | 28 |
| Proteaceae | *Helicia formosana* Hemsl*.* | sapling | 73 |
| Rhamnaceae | *Sageretia randaiensis* Hayata | vine | 7 |
| Rhamnaceae | *Ventilago leiocarpa* Benth*.* | sapling | 10 |
| Rosaceae | *Prunus phaeosticta* (Hance) Maxim. | sapling | 1 |
| Rosaceae | *Rubus croceacanthus* H.Lév. | herb | 6 |
| Rosaceae | *Rubus pyrifolius* Sm*.* | herb | 19 |
| Rubiaceae | *Dimetia hedyotidea* (DC.) T.C.Hsu | sapling | 7 |
| Rubiaceae | *Gardenia jasminoides* J.Ellis | sapling | 1 |
| Rubiaceae | *Lasianthus bunzanensis* Simizu | sapling | 21 |
| Rubiaceae | *Lasianthus fordii* Hance | sapling | 25 |
| Rubiaceae | *Lasianthus formosensis* Matsum*.* | sapling | 6 |
| Rubiaceae | *Lasianthus microstachys* Hayata | sapling | 1 |
| Rubiaceae | *Lasianthus obliquinervis* Merr. | sapling | 1 |
| Rubiaceae | *Lasianthus wallichii* (Wight & Arn.) Wight | sapling | 46 |
| Rubiaceae | *Morinda umbellata* L. | vine | 1 |
| Rubiaceae | *Mussaenda pubescens* W.T.Aiton | vine | 3 |
| Rubiaceae | *Paederia foetida* L. | vine | 8 |
| Rubiaceae | *Psychotria rubra* (Lour.) Poir. | sapling | 60 |
| Rubiaceae | *Psychotria serpens* L. | vine | 2 |
| Rubiaceae | *Randia cochinchinensis* (Lour.) Merr. | sapling | 3 |
| Rubiaceae | *Rubia akane* Nakai | herb | 1 |
| Rubiaceae | *Tricalysia dubia* (Lindl.) Ohwi | sapling | 27 |
| Rubiaceae | *Wendlandia formosana* Cowan | sapling | 7 |
| Rubiaceae | *Wendlandia uvariifolia* Hance | sapling | 1 |
| Rutaceae | *Glycosmis citrifolia* (Willd.) Lindl. | sapling | 38 |
| Rutaceae | *Melicope pteleifolia* (Champ. *ex* Benth.) T.G.Hartley | sapling | 4 |
| Rutaceae | *Toddalia asiatica* (L.) Lam*.* | sapling | 2 |
| Rutaceae | *Zanthoxylum nitidum* (Roxb.) DC. | sapling | 17 |
| Rutaceae | *Zanthoxylum scandens* Blume | vine | 10 |
| Salicaceae | *Casearia membranacea* Hance | sapling | 10 |
| Schisandraceae | *Kadsura japonica* (L.) Dunal | vine | 2 |
| Solanaceae | *Lycianthes biflora* (Lour.) Bitter | herb | 1 |
| Styracaceae | *Styrax suberifolius* Hook. & Arn. | sapling | 12 |
| Symplocaceae | *Symplocos theophrastifolia* Siebold & Zucc. | sapling | 14 |
| Theaceae | *Camellia furfuracea* (Merr.) Cohen-Stuart | sapling | 14 |
| Theaceae | *Camellia nokoensis* Hayata | sapling | 14 |
| Theaceae | *Schima superba* Gardner & Champ. | sapling | 1 |
| Urticaceae | *Elatostema lineolatum* Wightvar*. majus* Wedd*.* | herb | 94 |
| Urticaceae | *Pilea microphylla* (L.) Liebm. | herb | 1 |
| Urticaceae | *Procris laevigata* Miq*.* | herb | 1 |
| Vitaceae | *Ampelopsis cantoniensis* (Hook. & Arn.) Planch. | vine | 13 |
| Vitaceae | *Cayratia corniculata* (Benth.) Gagnep. | vine | 14 |
| Vitaceae | *Cayratia japonica* (Thunb.) Gagnep. | vine | 1 |
| Vitaceae | *Cissus pteroclada* Hayata | vine | 37 |
| Vitaceae | *Tetrastigma bioritsense* (Hayata) Hsu & Kuoh | herb | 3 |
| Vitaceae | *Tetrastigma umbellatum* (Hemsl.) Nakai | vine | 2 |

Table S3. Pearson correlation coefficients between topographic factors and soil properties at a one-hectare natural forest plot located in Lienhuachih area of the low-altitude mountains in central Taiwan. *: p < 0.05.

|  | Elevation | | Stream  distance | | Curvature | | Slope | | TWI | Aspect | |
| --- | --- | --- | --- | --- | --- | --- | --- | --- | --- | --- | --- |
| pH | -0.88 | * | -0.30 | * | -0.10 |  | -0.13 |  | 0.02 | 0.26 | * |
| N (%) | -0.24 | * | -0.47 | * | -0.18 |  | 0.26 | * | -0.03 | 0.09 |  |
| C/N ratio | -0.21 | * | -0.57 | * | -0.21 | * | 0.35 | * | 0.03 | 0.12 |  |
| P (mg/kg) | 0.41 | * | -0.33 | * | -0.18 |  | 0.47 | * | 0.04 | -0.01 |  |
| K (cmole/kg) | 0.75 | * | -0.14 |  | -0.08 |  | 0.43 | * | 0.03 | -0.09 |  |
| Ca (cmole/kg) | 0.59 | * | -0.16 |  | 0.12 |  | -0.05 |  | -0.14 | -0.01 |  |
| Mg (cmole/kg) | 0.81 | * | -0.02 |  | -0.01 |  | 0.29 | * | -0.03 | -0.07 |  |
| Mn (cmole/kg) | 0.85 | * | 0.03 |  | 0.03 |  | 0.14 |  | -0.03 | -0.16 |  |
| Zn (cmole/kg) | -0.19 |  | -0.51 | * | -0.20 | * | 0.31 | * | 0.00 | 0.05 |  |
| Fe (cmole/kg) | -0.59 | * | 0.24 | * | 0.10 |  | -0.46 | * | -0.04 | 0.02 |  |
| Cu (cmole/kg) | 0.69 | * | -0.18 |  | -0.09 |  | 0.42 | * | 0.03 | -0.02 |  |
| Soil water (%) | 0.29 | * | -0.28 | * | -0.09 |  | 0.20 | * | 0.17 | -0.03 |  |

Supplementary Note

Indicator value analysis (IndVal) was used to evaluate ecological indicator species for the groups. “A” denotes the ratio of the number of plots containing a specific species across the entire sample plots to the number of plots in a designated group, with a threshold of >50% established for the selected species. “B” denotes the ratio of the number of plots in which of a specific species within the specified group, with a threshold of >30% for the selected species. The indicator value is calculated as sqrtIV = √(A*B), and the significance level is indicated by the p-value. A p-value of <0.05 allows for the selection as an indicator species. This value is assessed using a permutation test comprising 999 permutations.

References

De Cáceres, M. & Legendre, P. Associations between species and groups of sites: Indices and statistical inference. Ecology **90**, 3566–3574 (2009).

De Cáceres, M., Legendre, P., Wiser, S. K. & Brotons, L. Using species combinations in indicator value analyses. Methods Ecol. Evol. **3**, 973–982 (2012).
